# Supplementary material
Source: ML conference proceedings conference paper supplement (https://proceedings.mlr.press/v164/li22d.html)
Supplement: Supplementary file 1 [file li22d-supp.zip]

Archive with 2 entries (2 files):
- supplemental-corl2021.pdf
- __MACOSX/._supplemental-corl2021.pdf
